# Supplementary material for: PEOPLE (NCT03447678), a first-line phase II pembrolizumab trial, in negative and low PD-L1 advanced NSCLC: clinical outcomes and association with circulating immune biomarkers
Source: PubMed Central journal article supplement — ESMO Open. 2022 Nov 28;7(6):100645. doi: 10.1016/j.esmoop.2022.100645 (PMC9808469; doi:10.1016/j.esmoop.2022.100645), 2022-11-28
Supplement: mmc3.pdf [file mmc3.pdf]

UNIVARIABLE ANALYSIS

| CLUSTER | Main lineage                   | Subset # | Immune subset as defined by flow cytometry                                                  | BASELINE |       |        | FIRST DISEASE EVALUATION |        |        |
|---------|--------------------------------|----------|---------------------------------------------------------------------------------------------|----------|-------|--------|--------------------------|--------|--------|
|         |                                |          |                                                                                             | DCR      | PFS   | OS     | DCR                      | PFS    | OS     |
| 1       | Monocytes                      | 1        | CD14 <sup>+</sup>                                                                           |          |       | <0.001 |                          |        |        |
|         | Monocytes                      | 2        | CD14 <sup>+</sup> /HLA-DR <sup>+</sup>                                                      |          |       | <0.001 |                          |        |        |
|         | Granulocytes                   | 3        | CD15 <sup>hi</sup>                                                                          |          | 0,025 | <0.001 | 0,014                    | 0,015  | <0.001 |
|         | Granulocytes                   | 4        | CD16 <sup>+</sup>                                                                           |          | 0,029 | <0.001 | 0,014                    | 0,011  | <0.001 |
|         | All leukocytes                 | 5        | CD45 <sup>+</sup>                                                                           |          |       | <0.001 |                          |        | 0,031  |
|         | Monocytes                      | 6        | Classical CD14 <sup>+</sup> CD16 <sup>-</sup>                                               |          |       | <0.001 |                          |        |        |
|         | Monocytes                      | 7        | Classical CD14 <sup>+</sup> CD16 <sup>-</sup> /HLA-DR <sup>+</sup>                          |          |       | <0.001 |                          |        |        |
|         | MDSCs                          | 8        | G-MDSCs (HLA-DR <sup>Lo</sup> , CD33 <sup>+</sup> , CD15 <sup>+</sup> , CD14 <sup>-</sup> ) |          | 0,030 | 0,001  |                          | 0,010  | <0.001 |
|         | Monocytes HLA-DR <sup>Lo</sup> | 9        | Granulocyte <sup>-</sup> /HLA-DR <sup>dim</sup> CD14 <sup>+</sup>                           |          | 0,025 | <0.001 | 0,022                    |        | 0,005  |
|         | All granulocytes               | 10       | Granulocytes (CD15 <sup>+</sup> or CD16 <sup>+</sup> )                                      |          | 0,025 | <0.001 | 0,014                    | 0,015  | <0.001 |
|         | Monocytes                      | 11       | Intermediate CD14 <sup>+</sup> CD16 <sup>+</sup>                                            |          |       | <0.001 |                          |        |        |
|         | Monocytes                      | 12       | Intermediate CD14 <sup>+</sup> CD16 <sup>+</sup> /HLA-DR <sup>+++</sup>                     |          |       | 0,002  |                          |        |        |
|         | MDSCs                          | 13       | M-MDSCs (HLA-DR <sup>Lo</sup> , CD33 <sup>+</sup> , CD15 <sup>-</sup> , CD14 <sup>+</sup> ) |          |       | <0.001 |                          |        | 0,024  |
|         | Granulocytes                   | 14       | Neutrophils (CD15 <sup>+</sup> CD16 <sup>+</sup> double positive)                           |          | 0,029 | <0.001 | 0,014                    | 0,011  | <0.001 |
| 2       | T cells                        | 15       | CD3 <sup>+</sup>                                                                            |          | 0,008 |        | 0,025                    | <0.001 | <0.001 |
|         | NKT and NK cells               | 16       | CD56 <sup>+</sup>                                                                           | 0,030    | 0,020 |        |                          |        |        |
|         | Lymphocytes                    | 17       | Granulocyte <sup>-</sup> /HLA-DR <sup>dim</sup> CD14 <sup>-</sup>                           | 0,043    | 0,003 |        | 0,026                    | <0.001 | <0.001 |
|         | All lymphocytes                | 18       | Lymphocytes (CD3 <sup>+</sup> or CD19 <sup>+</sup> or CD56 <sup>+</sup> )                   | 0,039    | 0,001 |        | 0,016                    | <0.001 | <0.001 |
|         | NK cells                       | 19       | NK cells (all CD3 <sup>-</sup> CD56 <sup>+</sup> )                                          | 0,008    | 0,001 |        | 0,017                    | 0,004  | 0,022  |
|         | NK cells                       | 20       | NK cells /CD56 <sup>dim</sup> CD16 <sup>+</sup>                                             | 0,007    | 0,001 |        | 0,017                    | 0,004  | 0,024  |
| 3       | Granulocytes                   | 21       | Eosinophils (CD15 <sup>+</sup> CD16 <sup>-</sup> )                                          |          |       |        |                          | 0,026  | 0,015  |
|         | NK cells                       | 22       | NK cells /CD56 <sup>br</sup> CD16 <sup>-</sup>                                              |          |       |        |                          |        |        |
|         | NK cells                       | 23       | NK cells /CD56 <sup>br</sup> CD16 <sup>-</sup> /HLA-DR <sup>+</sup>                         |          |       | 0,012  |                          |        | 0,046  |
|         | NK cells                       | 24       | NK cells /CD56 <sup>br</sup> CD16 <sup>dim</sup>                                            |          |       |        |                          |        |        |
|         | NK cells                       | 25       | NK cells /CD56 <sup>br</sup> CD16 <sup>dim</sup> /HLA-DR <sup>+</sup>                       |          |       |        |                          |        |        |
| 4       | B cells                        | 26       | CD19 <sup>+</sup>                                                                           |          |       |        |                          |        |        |
|         | B cells                        | 27       | CD19 <sup>+</sup> /HLA-DR <sup>+</sup>                                                      |          |       |        |                          |        |        |
| 5       | Activated T cells              | 28       | CD3 <sup>+</sup> /HLA-DR <sup>+</sup>                                                       |          |       |        |                          |        |        |
|         | NKT cells                      | 29       | NK T-Like cells                                                                             |          |       |        |                          |        |        |
|         | NKT cells                      | 30       | NK T-Like cells/HLA-DR <sup>+</sup>                                                         |          |       | 0,024  |                          |        |        |
| 6       | NK cells                       | 31       | NK cells /CD56 <sup>dim</sup> CD16 <sup>-</sup>                                             |          |       |        |                          |        |        |
|         | NK cells                       | 32       | NK cells /CD56 <sup>dim</sup> CD16 <sup>-</sup> /HLA-DR <sup>+</sup>                        |          |       |        |                          |        |        |
|         | NK cells                       | 33       | NK cells /CD56 <sup>dim</sup> CD16 <sup>+</sup> /HLA-DR <sup>+</sup>                        |          |       |        |                          |        |        |
|         | NK cells                       | 34       | NK cells /HLA-DR <sup>+</sup>                                                               |          |       |        |                          |        |        |
| 7       | Monocytes                      | 35       | Non-classical CD14 <sup>dim</sup> CD16 <sup>+</sup>                                         |          |       |        | 0,019                    | 0,028  |        |
|         | Monocytes                      | 36       | Non-classical CD14 <sup>dim</sup> CD16 <sup>+</sup> /HLA-DR <sup>++</sup>                   |          |       |        | 0,014                    |        |        |
